# Supplementary material for: Green synthesis of a Se/HPCF–rGO composite for Li–Se batteries with excellent long-term cycling performance
Source: Royal Society of Chemistry journal article supplement (doi:10.1039/c7ta06884k), 2017-01-01
Supplement: c7ta06884k1.pdf [file c7ta06884k1.pdf]

## Electronic Supporting Information

### **Green synthesis of Se/HPCF-rGO composite towards Li - Se batteries with excellent long-term cycling performance**

Lingxing Zeng,<sup>a</sup> Xi Chen,<sup>a</sup> Renpin Liu,<sup>a</sup> Liangxu Lin,<sup>d</sup> Cheng Zheng,<sup>b</sup> Lihong Xu,<sup>a</sup> Fenqiang Luo,<sup>a</sup> Qingrong Qian,<sup>\*a, c</sup> Qinghua Chen,<sup>a, c</sup> and Mingdeng Wei <sup>\*b</sup>

<sup>a</sup> Engineering Research Center of Polymer Green Recycling of Ministry of Education, Fujian Normal University, Fuzhou, Fujian 350007, China.

<sup>b</sup> Institute of Advanced Energy Materials, Fuzhou University, Fuzhou, Fujian 350002, China.

<sup>c</sup> Fujian Key Laboratory of Pollution Control & Resource Reuse, Fuzhou, Fujian 350007, China.

<sup>d</sup> The State Key Laboratory of Refractories and Metallurgy, Wuhan University of Science and Technology, Wuhan 430081, China.

E-mail: qrqian@fjnu.edu.cn, Tel: +86-591-83465156; wei-mingdeng@fzu.edu.cn, Tel: +86-591-83753180.

**Table S1** The BET specific surface area and pore volume of LN-PAN composite fibers after different synthesis process.

| LN: PAN sample          | $S_{\text{BET}}$<br>( $\text{m}^2/\text{g}$ ) | $V_{\text{total}}$<br>( $\text{cm}^3/\text{g}$ ) |
|-------------------------|-----------------------------------------------|--------------------------------------------------|
| 6:4 before immersion    | 3.1                                           | 0.009                                            |
| 6:4 after immersion     | 12.8                                          | 0.113                                            |
| 6:4 after carbonization | 266.5                                         | 0.26                                             |
| 6:4 after activation    | 1058                                          | 0.55                                             |

**Table S2** The BET specific surface area and pore volume of porous carbon fibers obtained from different LN : PAN (mass ratio) precursor.

| LN: PAN sample        | $S_{\text{BET}}$<br>( $\text{m}^2/\text{g}$ ) | $V_{\text{total}}$<br>( $\text{cm}^3/\text{g}$ ) |
|-----------------------|-----------------------------------------------|--------------------------------------------------|
| 5:5 after activation  | 947                                           | 0.53                                             |
| 6:4 after activation  | 1058                                          | 0.55                                             |
| 7:3 after activation  | 1007                                          | 0.52                                             |
| 0:10 after activation | 65                                            | 0.11                                             |

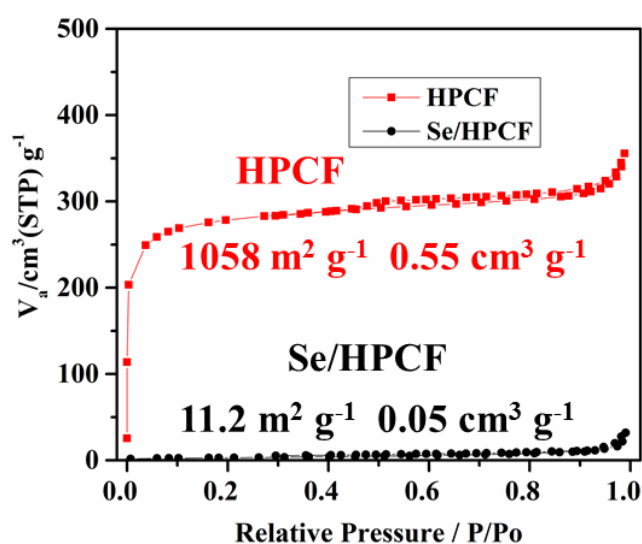

**Fig. S1**  $\text{N}_2$  adsorption-desorption isotherms for Se/HPCF and HPCF.

**Table S3** A comparison of cycling and rate performance of Se-C composites reported in the literatures with present work.

| Electrode Description                        | Se content (wt%) | Cycling performance |                                                               |               | Rate performance     |                                                         | Ref. |
|----------------------------------------------|------------------|---------------------|---------------------------------------------------------------|---------------|----------------------|---------------------------------------------------------|------|
|                                              |                  | Current density     | Final discharge Capacity (mAh g <sup>-1</sup> <sub>Se</sub> ) | Cycle numbers | Current density      | Capacity retention (mAh g <sup>-1</sup> <sub>Se</sub> ) |      |
| Se/mesoporous carbon spheres                 | 30               | 0.25 C              | 480                                                           | 1000          | 0.1 C<br>5 C         | 500<br>229                                              | S1   |
| Se/CMK-3                                     | 49               | 0.1C                | 600                                                           | 50            | 0.1 C<br>1 C         | 670<br>432                                              | S2   |
| Se/microporous carbon spheres                | 70.5             | 1 C                 | 780                                                           | 1200          | 0.5 C<br>20 C        | 605<br>386                                              | S3   |
| Se/MPCS                                      | 60               | 0.25 C              | 320                                                           | 500           | 0.25 C<br>5 C        | 640<br>430                                              | S4   |
| Se/N-containing hierarchical porous carbon   | 56.2             | 2 C                 | 305                                                           | 60            | 0.2 C<br>5 C         | 500<br>261                                              | S5   |
| Se-confined microporous carbon               | 51               | 1 C                 | 249                                                           | 3000          | 0.1 C<br>5 C         | 500<br>241                                              | S6   |
| Se/PHCBs                                     | ~50              | 0.1 C               | 606                                                           | 120           | 0.1 C<br>1 C         | 691<br>432                                              | S7   |
| Se/HPCA                                      | 56               | 0.5 C               | 309                                                           | 100           | 1 C<br>5 C           | 400<br>301                                              | S8   |
| Se/MCN-RGO                                   | 62               | 1 C                 | 385                                                           | 1300          | 0.1 C<br>3 C         | 650<br>274                                              | S9   |
| Selenium–metal complex-derived porous carbon | 72               | 5 C                 | 417                                                           | 1000          | 0.1 C<br>20 C        | 641<br>510                                              | S10  |
| Se/porous carbon nanofibers                  | 52.3             | 0.74 C              | 516                                                           | 900           | 0.147 C<br>5.9 C     | 637<br>306                                              | S11  |
| Se-CDC                                       | 62               | 0.2 c               | 420                                                           | 150           | 0.1C<br>2C           | 460<br>310                                              | S12  |
| Se@N-doped MPCS                              | ~50              | 0.93 C              | 510                                                           | 1000          | 0.09 C<br>4.7 C      | 635<br>440                                              | S13  |
| Se/PAN-CNT                                   | 35               | 0.74 C              | 517                                                           | 500           | 1.47 C               | 485                                                     | S14  |
| Se/carbon-rich core-shell                    | 43.2             | 0.5 C               | 181                                                           | 80            | 0.5 C<br>3 C         | 558<br>155                                              | S15  |
| Se/PTCDA-derived carbon                      | 54               | 0.147 C             | 430                                                           | 250           | 1.77 C               | 280                                                     | S16  |
| MWCNT/Se                                     | 56.17            | 0.5 C               | 356                                                           | 100           | 0.5 C<br>4 C         | 646<br>358                                              | S17  |
| Se/N-doped carbon sponges                    | 50               | 0.5C                | 443                                                           | 200           | 5 C                  | 287                                                     | S18  |
| 3DG-CNT@Se                                   | 51               | 0.2 C               | 504                                                           | 150           | 0.2 C<br>1 C<br>10 C | 609<br>558<br>193                                       | S19  |

|                       |      |                    |                   |                      |              |             |           |
|-----------------------|------|--------------------|-------------------|----------------------|--------------|-------------|-----------|
| Se/microporous carbon | 51.4 | 5 C                | 511               | 1000                 | 20 C         | 569         | S20       |
| Se/CNSs               | 60   | 0.5C               | 376               | 1000                 | 0.1C<br>10C  | 700<br>~390 | S21       |
| Se-NCSs               | 56   | 0.1C<br>1C         | 480<br>301        | 100<br>500           | 0.2C<br>2C   | 475<br>275  | S22       |
| Se/CMCs               | ~50  | 0.2C               | 425.2             | 100                  | 0.2C<br>5C   | 420<br>218  | S23       |
| Se@CNx nanobelts      | 62.5 | 1.2 C              | 453               | 400                  | 2.36 C       | 474         | S24       |
| Se/hollow carbon      | 59.5 | 0.74 C             | 525               | 1000                 | 2.9 C        | 496         | S25       |
| Se/HPCF-rGO           | 57   | 2 C<br>5 C<br>10 C | 418<br>287<br>208 | 1000<br>3000<br>5000 | 0.2 C<br>5 C | 584<br>408  | This work |

## Refs

- [S1] C. Luo, Y. H. Xu, Y. J. Zhu, Y. H. Liu, S. Y. Zheng, Y. Liu, A. Langrock and C. S. Wang, *ACS Nano*, 2013, **7**, 8003–8010.
- [S2] C. P. Yang, S. Xin, Y. X. Yin, H. Ye, J. Zhang and Y. G. Guo, *Angew. Chem. Int. Ed.*, 2013, **52**, 8363–8367.
- [S3] Z. Li, L. X. Yuan, Z. Q. Yi, Y. Liu and Y. H. Huang, *Nano Energy*, 2014, **9**, 229–236.
- [S4] H. Ye, Y. X. Yin, S. F. Zhang and Y. G. Guo, *J. Mater. Chem. A*, 2014, **2**, 13293–13298.
- [S5] Y. H. Qu, Z. A. Zhang, S. F. Jiang, X. W. Wang, Y. Q. Lai, Y. X. Liu and J. Li, *J. Mater. Chem. A*, 2014, **2**, 12255–12261.
- [S6] Y. X. Liu, L. Si, X. S. Zhou, X. Liu, Y. Xu, J. C. Bao and Z. H. Dai, *J. Mater. Chem. A*, 2014, **2**, 17735–17739.
- [S7] J. J. Zhang, L. Fan, Y. C. Zhu, Y. H. Xu, J. W. Liang, D. H. Wei and Y. T. Qian, *Nanoscale*, 2014, **6**, 12952–12957.
- [S8] S. F. Jiang, Z. A. Zhang, Y. Q. Lai, Y. Q. Qu, X. W. Wang and J. Li, *J. Power Sources*, 2014, **267**, 394–404.
- [S9] K. Han, Z. Liu, J. Shen, Y. Lin, F. Dai and H. Ye, *Adv. Funct. Mater.*, 2015, **25**, 455–463.
- [S10] X. N. Li, J. W. Liang, Z. G. Hou, W. Q. Zhang, Y. Wang, Y. C. Zhu and Y. T. Qian, *Adv. Funct. Mater.*, 2015, **25**, 5229–5238.
- [S11] L. C. Zeng, W. C. Zeng, Y. Jiang, X. Wei, W. H. Li, C. L. Yang, Y. W. Zhu and Y. Yu, *Adv. Energy Mater.*, 2015, **5**, 1401377.
- [S12] J. T. Lee, H. Kim, M. Oschatz, D. C. Lee, F. Wu, H. T. Lin, B. Zdyrko, W. I. Cho, S. Kaskel and G. Yushin, *Adv. Energy Mater.*, 2015, **5**, 1400981.
- [S13] Y. Jiang, X. J. Ma, J. K. Feng and S. L. Xiong, *J. Mater. Chem. A*, 2015, **3**, 4539–4546.
- [S14] L. C. Zeng, X. Wei, J. Q. Wang, Y. Jiang, W. H. Li and Y. Yu, *J. Power Sources*, 2015, **281**, 461–469.
- [S15] Z. A. Zhang, X. Yang, Z. P. Guo, Y. H. Qu, J. Li and Y. Q. Lai, *J. Power Sources*, 2015, **279**, 88–93.
- [S16] C. Luo, J. J. Wang, L. M. Suo, J. F. Mao, X. L. Fan and C. S. Wang, *J. Mater. Chem. A*, 2015, **3**, 555–561.
- [S17] X. W. Wang, Z. A. Zhang, Y. H. Qu, G. C. Wang, Y. Q. Lai and J. Li, *J. Power Sources*, 2015, **287**, 247–252.
- [S18] Z. Li and L. Yin, *Nanoscale*, 2015, **7**, 9597–9606.
- [S19] J. R. He, Y. F. Chen, W. Q. Lv, K. C. Wen, P. J. Li, Z. G. Wang, W. L. Zhang, W. Qin and W. D. He, *ACS Energy Lett.*, 2016, **1**, 16–20.
- [S20] J. J. Zhou, J. Yang, Z. X. Xu, T. Zhang, Z. Y. Chen and J. L. Wang, *J. Mater. Chem. A*, 2017, **5**, 9350–9357.
- [S21] S. F. Zhang, W. P. Wang, S. Xin, H. Ye, Y. X. Yin and Y. G. Guo, *ACS Appl. Mater. Interfaces*, 2017, **9**, 8759–8765.
- [S22] H. L. Lv, R. P. Chen, X. Q. Wang, Y. Hu, Y. R. Wang, T. Chen, L. B. Ma, G. Y. Zhu, J. Liang, Z. X. Tie, J. Liu and Z. Jin, *ACS Appl. Mater. Interfaces*, 2017, **9**, 25232–25238.
- [S23] T. Liu, M. Jia, Y. Zhang, J. Han, Y. Li, S. J. Bao, D. Y. Liu, J. Jiang and M. W. Xu, *J. Power Sources*, 2017, **341**, 53–59.
- [S24] Q. F. Cai, Y. Y. Li, L. Wang, Q. W. Li, J. Xu, B. Gao, X. M. Zhang, K. F. Huo and P. K. Chu, *Nano Energy*, 2017, **32**, 1–9.
- [S25] Y. J. Hong and Y. C. Kang, *Carbon*, 2016, **111**, 198–206.

**Table S4** Impedance parameters calculated from an equivalent circuit model.

| Sample      | $R_s/\Omega$ | $R_f/\Omega$ | $R_{ct}/\Omega$ |
|-------------|--------------|--------------|-----------------|
| Se/HPCF-rGO | 7.2          | 17.3         | 21.2            |
| Se/MPCF-rGO | 4.5          | 48.2         | 96.3            |
| Se/HPCF     | 3.1          | 28.7         | 51.1            |

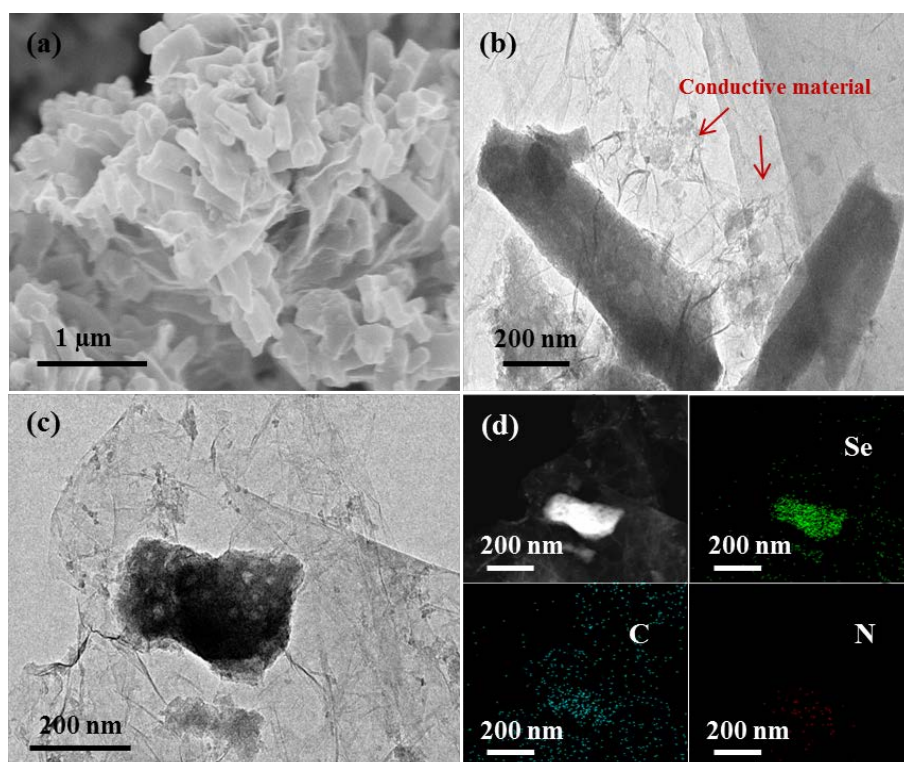

**Fig. S2** (a) SEM and (b-c) TEM images of Se/HPCF-rGO composite after 200 cycles test at 0.5 C and (d) the corresponding elemental mapping results for Se, C and N.
